# Supplementary material
Source: PubMed Central journal article supplement (PMC3526373)
Supplement: NIHMS157836-supplement-Supplementary_Data_set_1.pdf [file NIHMS157836-supplement-Supplementary_Data_set_1.pdf]

## Quality Assurance of Infused CTLs

| <b>Test for:</b>                              | <b>Release Criteria:</b>                                                                                                                                                                                                                                                           | <b>Testing Method:</b>                                                                                                                                                 |
|-----------------------------------------------|------------------------------------------------------------------------------------------------------------------------------------------------------------------------------------------------------------------------------------------------------------------------------------|------------------------------------------------------------------------------------------------------------------------------------------------------------------------|
| Viability of Clinical Preparation             | >75%                                                                                                                                                                                                                                                                               | Trypan blue exclusion                                                                                                                                                  |
| Cell-Surface Phenotype                        | Uniformly TCR $\alpha/\beta$ <sup>+</sup> , CD4 <sup>-</sup> , CD8 <sup>+</sup> , IL-13 <sup>+</sup>                                                                                                                                                                               | Flow cytometric evaluation with isotype controls.                                                                                                                      |
| Vector Rearrangement                          | Single band                                                                                                                                                                                                                                                                        | Southern Blot with HyTK-Specific Probe                                                                                                                                 |
| IL-13 zetakine Expression                     | Presence of chimeric zeta and endogenous zeta bands                                                                                                                                                                                                                                | Western Blot with Human Zeta-Specific Primary Antibody                                                                                                                 |
| IL-13R $\alpha$ 2 Specific Cytolytic Activity | >25% Specific Lysis at E:T Ratio of 5:1 Against IL13R $\alpha$ 2 <sup>+</sup> Daudi. Lysis of Daudi parental <2X % lysis of parental Daudi at same E:T.                                                                                                                            | 4hr-Chromium Release Assay                                                                                                                                             |
| Sensitivity to Ganciclovir                    | <15% Cell viability After 14-days of co-culture in 5 $\mu$ M ganciclovir.                                                                                                                                                                                                          | Trypan blue-exclusion cell enumeration.                                                                                                                                |
| Sterility                                     | All screening bacterial/fungal cultures neg for >14 days.<br>Mycoplasma negative at time of cryopreservation and within 72hrs of each treatment cycle<br>Endotoxin level <5E.I./kg in washed cell preparation.<br>Gram stain of cell culture media negative on day of re-infusion. | Bacterial/fungal by routine clinical specimen culture.<br><br>Mycoplasma by Gene-Probe RIA.<br><br>Endotoxin by ELISA.<br><br>Gram stain by clinical microbiology lab. |
