# Supplementary material
Source: PubMed Central journal article supplement (PMC3526373)
Supplement: NIHMS157836-supplement-Time_line_of_events.pdf [file NIHMS157836-supplement-Time_line_of_events.pdf]

## Comprehensive Metabolic Panel:

|                                  | Baseline | Day 2 | Day 8 |
|----------------------------------|----------|-------|-------|
| Sodium (mmole/L)                 | 138      | 142   | 140   |
| Potassium (mmole/L)              | 4.8      | 3.8   | 4.4   |
| Chloride (mmole/L)               | 103      | 99    | 100   |
| CO2 (mmole/L)                    | 28       | 32    | 33    |
| Glucose (mg/dL)                  | 114      | 124   | 94    |
| Creatinine (mg/dL)               | 1.1      | 1.3   | 1.2   |
| Urea Nitrogen (mg/dL)            | 17       | 14    | 14    |
| Total Protein (g/dL)             | 7        | 8.5   | 8     |
| Albumin (g/dL)                   | 4.2      | 4.4   | 4.3   |
| Total Bilirubin (mg/dL)          | 0.5      | 0.4   | 0.5   |
| Total Alkaline Phosphatase (U/L) | 88       | 99    | 98    |
| AST (SGOT) (U/L)                 | 16       | 26    | 28    |
| ALT (SGPT) (U/L)                 | 18       | 25    | 27    |
| Calcium (mg/dL)                  | 9        | 9.6   | 9.6   |

## Automated Blood Count

|                       |      |      |      |
|-----------------------|------|------|------|
| WBC (K/uL)            | 4.93 | 4.3  | 4.4  |
| RBC (Million/uL)      | 4.9  | 5.05 | 4.94 |
| Hemoglobin (g/dL)     | 14.8 | 15.8 | 15.1 |
| Hematocrit (%)        | 42.5 | 44.3 | 43   |
| MCV (fL)              | 86.7 | 87.7 | 87.1 |
| MCH (pg)              | 30.2 | 31.2 | 30.6 |
| MCHC (g/dL)           | 34.8 | 35.6 | 35.2 |
| RDW (%)               | 12.5 | 13.9 | 14.1 |
| Platelet count (K/uL) | 148  | 155  | 179  |

## Differential

|                   |      |      |      |
|-------------------|------|------|------|
| Neutrophil (%)    | 74.7 | 74.2 | 72.5 |
| Lymphocyte (%)    | 17   | 16.1 | 18.8 |
| Monocyte (%)      | 6.5  | 5.8  | 6.3  |
| Eosinophil (%)    | 1.4  | 2    | 2    |
| Basophil (%)      | 0.4  | 1.9  | 0.4  |
| Neutrophil (K/uL) | 3.7  |      |      |
| Lymphocyte (K/uL) | 0.8  |      |      |
| Monocyte (K/uL)   | 0.3  |      |      |
| Eosinophil (K/uL) | 0.1  |      |      |
| Basophil (K/uL)   | 0    |      |      |

## Urine Analysis

|                    |          |          |          |
|--------------------|----------|----------|----------|
| Color              | Yellow   | Yellow   | Yellow   |
| Specific Gravity   | 1.014    | 1.015    | 1.015    |
| pH                 | 7        | 6.5      | 6.5      |
| Blood              | Negative | Trace    | Trace    |
| Bilirubin          | Negative | Negative | Negative |
| Ketones            | Negative | Negative | Negative |
| Glucose            | Negative | Negative | Negative |
| Protein            | 2+       | Negative | Negative |
| Nitrite            | Negative | Negative | Negative |
| Leukocyte Esterase | Negative | Negative | Negative |
| RBC                | 5        | 2 to 5   | 2 to 5   |
| WBC                | 2        | <2       | <2       |
| Squamous Ep Cells  | 0        | Negative | Negative |
| Hyaline Casts      | 0-2/LPF  | Negative | Negative |

### Vital Signs:

[<sup>18</sup>F]FHBG Injection Time: 1:52 PM  
 Baseline Temperature: 37 °C @ 1:50 PM  
 Baseline Heart Rate (Beats/min): 59 @ 1:31 PM  
 Baseline Blood Pressure (mmHg): Systolic: 130 Diastolic: 76 1:35 PM  
 Baseline Blood Oxygen (%): 99 @ 1:15 PM  
 Baseline Respiratory Rate (per minute): 21 @ 1:23 PM

| Time After Injection | Actual Measurement Time | Temperature °C             |
|----------------------|-------------------------|----------------------------|
| 5 min                | 1:58 PM                 | 36.6                       |
| 10 min               | 2:04 PM                 | 37                         |
| 15 min               | 2:09 PM                 | 37                         |
| 30 min               | 2:24 PM                 | 37                         |
| 60 min               | 2:54 PM                 | 36.6                       |
| 120 min              | 3:57 PM                 | 36.5                       |
| Time After Injection | Actual Measurement Time | Blood Pressure (mmHg)      |
| 5 min                | 1:57 PM                 | Sys: 131 Dia: 70           |
| 10 min               | 2:03 PM                 | Sys: 130 Dia: 76           |
| 15 min               | 2:08 PM                 | Sys: 115 Dia: 72           |
| 30 min               | 2:23 PM                 | Sys: 118 Dia: 72           |
| 60 min               | 2:53 PM                 | Sys: 127 Dia: 77           |
| 120 min              | 3:54 PM                 | Sys: 137 Dia: 78           |
| Time After Injection | Actual Measurement Time | Heart Rate (beats/min)     |
| 5 min                | 1:58 PM                 | 55                         |
| 10 min               | 2:03 PM                 | 56                         |
| 15 min               | 2:08 PM                 | 54                         |
| 30 min               | 2:23 PM                 | 58                         |
| 60 min               | 2:54 PM                 | 55                         |
| 120 min              | 3:54 PM                 | 53                         |
| Time After Injection | Actual Measurement Time | Blood Oxygen %             |
| 5 min                | 1:57 PM                 | 94                         |
| 10 min               | 2:02 PM                 | 93                         |
| 15 min               | 2:07 PM                 | 93                         |
| 30 min               | 2:22 PM                 | 94                         |
| 60 min               | 2:52 PM                 | 97                         |
| 120 min              | 3:46 PM                 | 97                         |
| Time After Injection | Actual Measurement Time | Respiratory Rate (per min) |
| 5 min                | 2:00 PM                 | 19                         |
| 10 min               | 2:04 PM                 | 17                         |
| 15 min               | 2:09 PM                 | 18                         |
| 30 min               | 2:25 PM                 | 18                         |
| 60 min               | 2:56 PM                 | 20                         |
| 120 min              | 3:55 PM                 | 22                         |

### Vital Signs:

Continued on Follow-up Days

#### One Day After [<sup>18</sup>F]FHBG Injection

|                                |               |               |          |
|--------------------------------|---------------|---------------|----------|
| Temperature:                   | 36 °C         | @             | 11:15 AM |
| Heart Rate (Beats/min):        | 52            | @             | 11:15 AM |
| Blood Pressure (mmHg):         | Systolic: 123 | Diastolic: 77 | 11:15 AM |
| Blood Oxygen (%):              | 96            | @             | 11:15 AM |
| Respiratory Rate (per minute): | 18            | @             | 11:15 AM |

#### Seven Days After [<sup>18</sup>F]FHBG Injection

|                                |               |               |          |
|--------------------------------|---------------|---------------|----------|
| Temperature:                   | 36 °C         | @             | 10:20 AM |
| Heart Rate (Beats/min):        | 54            | @             | 10:20 AM |
| Blood Pressure (mmHg):         | Systolic: 116 | Diastolic: 75 | 10:20 AM |
| Blood Oxygen (%):              | 96            | @             | 10:20 AM |
| Respiratory Rate (per minute): | 18            | @             | 10:20 AM |
