# Supplementary material
Source: PubMed Central journal article supplement (PMC3526373)

**[<sup>18</sup>F]FHBG Blood Time Activity Curve**

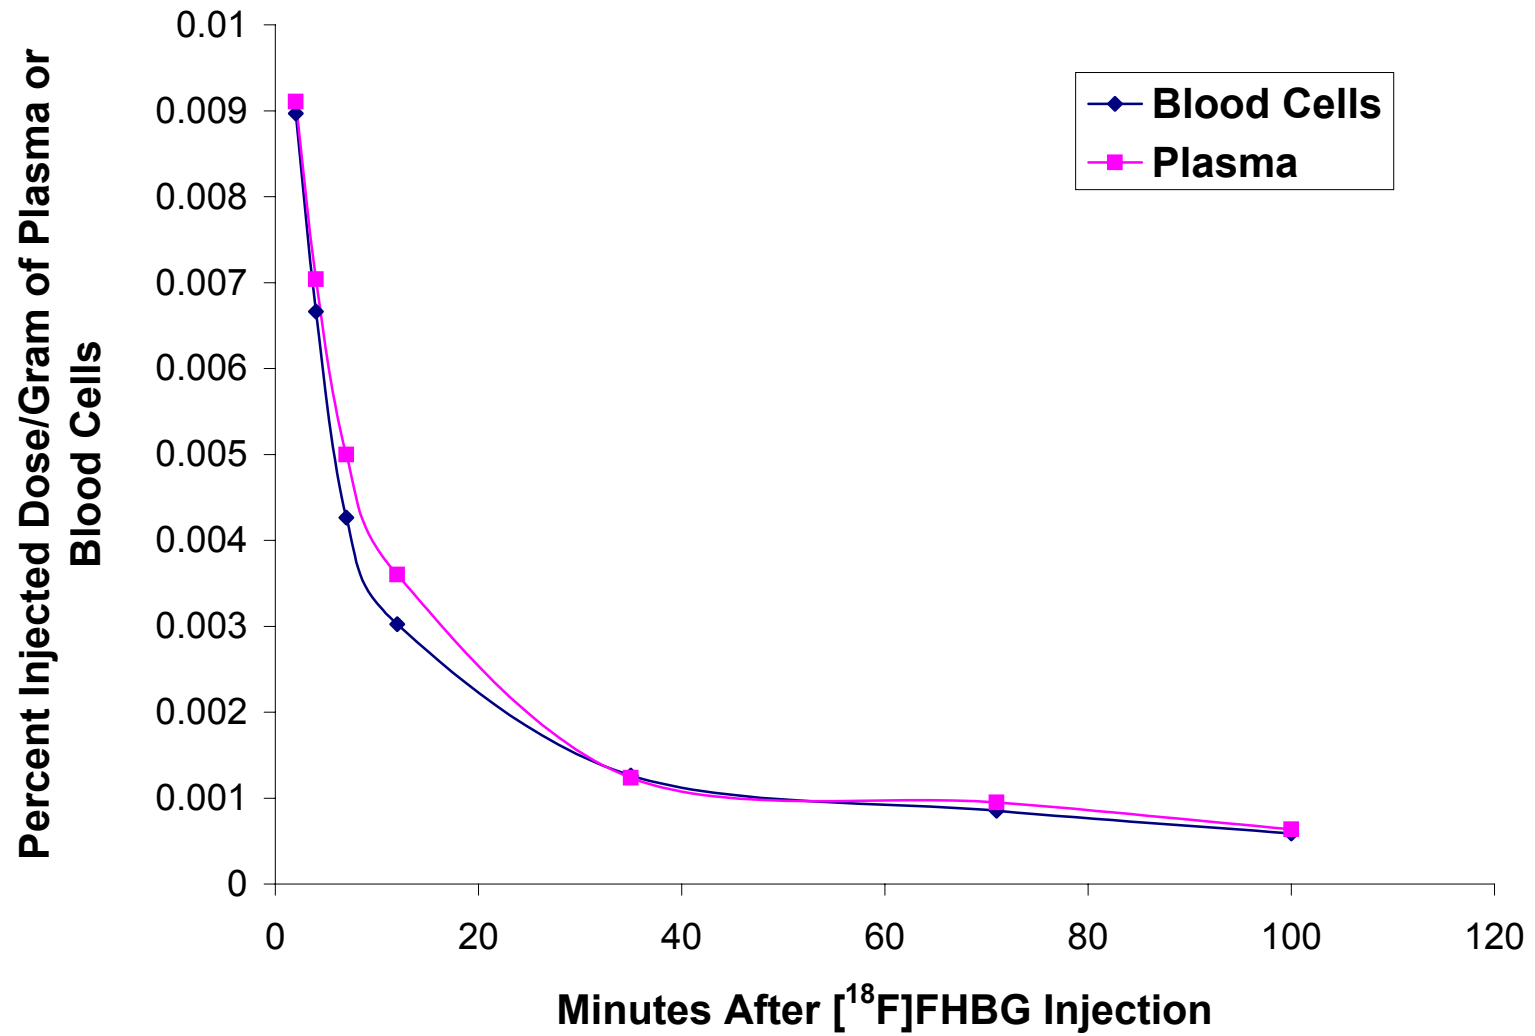

Supplement: NIHMS157836-supplement-CTL_quality_assurance_data.pdf [file NIHMS157836-supplement-CTL_quality_assurance_data.pdf]
